# Supplementary material for: The role of microRNA-23b-5p in regulating brown adipogenesis and thermogenic program
Source: PubMed Central journal article supplement — Endocr Connect. 2020 Apr 28;9(5):457–70. doi: 10.1530/EC-20-0124 (PMC7274556; doi:10.1530/ec-20-0124), 2020-04-28
Supplement: supplementary_table_1.pdf [file supplementary_table_1.pdf]

**Table S1. PCR primers used in this study.**

| <i>Gene</i>           | <i>Forward Sequence (5' to 3')</i> | <i>Reverse Sequence (5' to 3')</i> |
|-----------------------|------------------------------------|------------------------------------|
| mouse-Ucp-1           | AGGCTTCCAGTACCATTAGGT              | CTGAGTGAGGCAAAGCTGATTT             |
| mouse-Dio2            | GATGCTCCCAATTCCAGTGT               | TGAACCAAAGTTGACCACCA               |
| mouse-Pgc1 $\alpha$   | CCCTGCCATTGTTAAGACC                | TGCTGCTGTTCTGTTTTC                 |
| mouse-Cidea           | ATCACAACTGGCCTGGTTACG              | TACTACCCGGTGTCCATTTCT              |
| mouse-Cytochrome C    | GCAAGCATAAGACTGGACCAAA             | TTGTTGGCATCTGTGTAAGAGAATC          |
| mouse-Prdm16          | CAGCACGGTGAAGCCATTC                | GCGTGCATCCGCTTGTG                  |
| mouse-Ppar $\gamma$   | GTGCCAGTTTCGATCCGTA                | GGCCAGCATCGTGTAGATGA               |
| mouse-C/ebp $\beta$   | AGCGGCTGCAGAAGAAGGT                | GGCAGCTGCTTGAACAAGTTC              |
| mouse-C/ebp $\alpha$  | TGCGCAAGAGCCGAGATAAA               | CCTTCTGTTGCGTCTCCACG               |
| mouse-Fabp4           | AAGGTGAAGAGCATCATAACCT             | TCACGCCTTTCATAACACATTCC            |
| mouse-Tfam            | GGGTATGGAGAAGGAGGCC                | TCCCTGAGCCGAATCATCCT               |
| mouse-Nrf1            | AGGGCGGTGAAATGACCATC               | CGGCAGCTTCACTGTTGAGG               |
| mouse-Ampk $\alpha$ 1 | GTCAAAGCCGACCCAATGATA              | CGTACACGCAAATAATAGGGGT             |
| mouse-Ampk $\alpha$ 2 | AAGATCGGACACTACGTCCTG              | TGCCACTTTATGGCCTGTCAA              |
| mouse-Ampk $\beta$ 1  | GACGCCGACATCTTCCACTC               | GGGCTTTATCATTGCTTCCAG              |
| mouse-Ampk $\beta$ 2  | ACCATCTCTATGCACTGTCCA              | CAGCGTGGTGACATACTTCTT              |
| mouse-Cpt1b           | GAGACAGGACACTGTGTGGGTGA            | TGGTACGAGTTCTCGATGGCTTC            |
| mouse-Plin1           | TGGACCACCTGGAGGAAAAG               | CTTCGAAGGCGGGTAGAGATG              |
| mouse-Fasn            | ACCTCTCCCAGGTGTGTGAC               | CCTCCCGTACACTCACTCGT               |
| mouse-Acc1            | CTCTGCTAGAGCTGCAGGAT               | CTGGGAAACTGACACAGGAC               |
| mouse-Ppara           | ATGCCAGTACTGCCGTTTTC               | GGCCTTGACCTTGTTTCATGT              |
| mouse-Glut4           | GATGAGAAACGGAAGTTGGAGAGA           | GCACCACTGCGATGATCAGA               |
| mouse-Atgl            | TGTGGCCTCATTCTCCTAC                | TCGTGGATGTTGGTGGAGCT               |
| mouse-Hsl             | CACCCATAGTCAAGAACCCTTC             | TCTACCACTTTCAGCGTCACCG             |
| mouse-Acs1            | AGATCCTGAAGACTCTGCCTGTCC           | TTGCATCACTACCAATGTCCA              |
| mouse-Acs15           | CATTCGGCGGGACAGTTTG                | ATCCCATTCAGCCCTGAAG                |
| mouse-Acs11           | TGCCAGAGCTGATTGACATTC              | GGCATAACGAAAGGTGGTGAG              |
| mouse-Acad1           | CTACCTCATGCAAGAGCTTCCACA           | CTTCAAACATGAACTCACAGGCAGA          |
| mouse-Acadm           | TGATGTGGCGGCCATTAAGA               | GGGTTAGAACGTGCCAACAAGAA            |
| mouse-Acads           | AAGTTTGGATCCGCACAGCAG              | CAAGCTTTGGTGCCGTTGAG               |
| mouse-Acaa2           | GGCTCTGGTTTCCAGTCCATC              | GAAGCGCACATTTCTGACACAGTA           |
| mouse-Ndufs1          | CGGAAATTGCCGAACAGGTC               | CTGACCCCTCAAAAACCTGG               |
| mouse-Ndufs2          | CAGCCAGATATTGAATGGGCA              | TGTTGGTCACCGCTTTTTCT               |
| mouse-Ndufs3          | TGGCAGCACGTAAGAAGGG                | CTTGGGTAAGATTTAGCCACAT             |
| mouse-Sdha            | GGAACACTCCAAAAACAGACCT             | CCACCACTGGGTATTGAGTAGAA            |
| mouse-Sdhb            | ATTTACCGATGGGACCCAGAC              | GTCCGCACTTATTCAGATCCAC             |
| mouse-Uqcrc2          | AAAGTTGCCCCGAAGGTTAAA              | GAGCATAGTTTTCCAGAGAAGCA            |
| mouse-Uqcrc1          | AGACCCAGGTCAGCATCTTG               | GCCGATTCTTTGTTCCCTTGA              |
| mouse-Uqcrc3          | GTGGACCCCTAACAACAGTG               | CGGGAAGACACGCGATTATCA              |
| mouse-Cox5b           | GCTGCATCTGTGAAGAGGACAAC            | CAGCTTGTAAATGGGTTCCACAGT           |
| mouse-Cox8b           | GAACCATGAAGCCAACGACT               | GCGAAGTTCACAGTGGTTCC               |
| mouse-Cox7a1          | CAGCGTCATGGTCAGTCTGT               | AGAAAACCGTGTGGCAGAGA               |

|                     |                        |                        |
|---------------------|------------------------|------------------------|
| mouse-Atp5b         | GGTTCATCCTGCCAGAGACTA  | AATCCCTCATCGAACTGGACG  |
| mouse-ppia          | GAGCTGTTTGCAGACAAAGTTC | CCCTGGCACATGAATCCTGG   |
| mouse-mtNd1         | CCTATCACCCCTTGCCATCAT  | GAGGCTGTTGCTTGTGTGAC   |
| mouse-mtCox1        | CTACTATTTCGGAGCCTGAGC  | GCATGGGCAGTTACGATAAC   |
| mouse-Fatp4         | GGGGCCAATAAACTCTGCCT   | TCCAAGGGCTAAGCGAAAG    |
| mouse-Adam12        | CAGCAACTCCTGTGACCTCC   | GTACCAATGACAGGTCGGCT   |
| mouse-Ern1          | GAAGCCTCCTGAGAGTCAGC   | GAAGGTGAGCTGACGAGACC   |
| mouse-mt18S         | AGGAATTGACGGAAGGG CAC  | GTGCAGCCCCGGACATCTA AG |
| Human-UCP-1         | CTGGAATAGCGGCGTGCTT    | AATAAACTGGACGTCGGGC    |
| Human-PGC1 $\alpha$ | ACCTGACACAACACGGACAG   | GTCTCCATCATCCCGCAGAT   |
| Human-PPIA          | TTCATCTGCACTGCCAAGAC   | TCGAGTTGTCCACAGTCAGC   |

---
