# Supplementary material for: The role of microRNA-23b-5p in regulating brown adipogenesis and thermogenic program
Source: PubMed Central journal article supplement — Endocr Connect. 2020 Apr 28;9(5):457–70. doi: 10.1530/EC-20-0124 (PMC7274556; doi:10.1530/ec-20-0124), 2020-04-28
Supplement: supplementary_table_2.pdf [file supplementary_table_2.pdf]

**Table S2. a list of miRNAs significantly changed in BAT after cold exposure**

| <b>miRNA_ID</b>  | <b>BAT 28 °C</b> | <b>BAT 4 °C</b> | <b>log<sub>2</sub>(foldchange) </b> | <b>P-value</b> | <b>Significance</b> |
|------------------|------------------|-----------------|-------------------------------------|----------------|---------------------|
| mmu-miR-204-3p   | 0.0000           | 0.4868          | 12.2492                             | 0.0000         | **                  |
| mmu-miR-1957b    | 0.0000           | 0.4857          | 12.2458                             | 0.0000         | **                  |
| mmu-miR-3074-5p  | 0.0000           | 0.4857          | 12.2458                             | 0.0000         | **                  |
| mmu-miR-384-5p   | 0.4795           | 0.0000          | 12.2273                             | 0.0000         | **                  |
| mmu-miR-296-3p   | 0.4278           | 0.0000          | 12.0627                             | 0.0000         | **                  |
| mmu-miR-92a-1-5p | 0.4277           | 0.0000          | 12.0623                             | 0.0000         | **                  |
| mmu-miR-196b-5p  | 0.4196           | 0.0000          | 12.0347                             | 0.0000         | **                  |
| mmu-miR-1a-2-5p  | 0.4196           | 0.0000          | 12.0347                             | 0.0000         | **                  |
| mmu-miR-493-3p   | 0.0000           | 0.3979          | 11.9583                             | 0.0000         | **                  |
| mmu-miR-5709-5p  | 0.0000           | 0.3979          | 11.9583                             | 0.0000         | **                  |
| mmu-miR-183-3p   | 0.3948           | 0.0000          | 11.9468                             | 0.0000         | **                  |
| mmu-miR-542-5p   | 0.3948           | 0.0000          | 11.9468                             | 0.0000         | **                  |
| mmu-miR-770-3p   | 0.3896           | 0.0000          | 11.9277                             | 0.0000         | **                  |
| mmu-miR-1943-3p  | 0.0000           | 0.3895          | 11.9273                             | 0.0000         | **                  |
| mmu-miR-6966-3p  | 0.0000           | 0.3895          | 11.9273                             | 0.0000         | **                  |
| mmu-miR-3544-3p  | 0.0000           | 0.3885          | 11.9238                             | 0.0000         | **                  |
| mmu-miR-6516-3p  | 0.0000           | 0.3885          | 11.9238                             | 0.0000         | **                  |
| mmu-miR-483-5p   | 0.3667           | 0.0000          | 11.8403                             | 0.0000         | **                  |
| mmu-miR-351-3p   | 0.3619           | 0.0000          | 11.8214                             | 0.0000         | **                  |
| mmu-miR-669n     | 0.3619           | 0.0000          | 11.8214                             | 0.0000         | **                  |
| mmu-miR-300-5p   | 0.3596           | 0.0000          | 11.8122                             | 0.0000         | **                  |
| mmu-miR-1982-3p  | 0.0000           | 0.3570          | 11.8017                             | 0.0000         | **                  |
| mmu-miR-467d-5p  | 0.0000           | 0.3570          | 11.8017                             | 0.0000         | **                  |
| mmu-miR-5101     | 0.0000           | 0.3570          | 11.8017                             | 0.0000         | **                  |
| mmu-miR-6900-3p  | 0.0000           | 0.3570          | 11.8017                             | 0.0000         | **                  |
| mmu-miR-384-3p   | 0.0000           | 0.3562          | 11.7983                             | 0.0000         | **                  |
| mmu-miR-1191b-5p | 0.3361           | 0.0000          | 11.7147                             | 0.0000         | **                  |
| mmu-miR-452-5p   | 0.3361           | 0.0000          | 11.7147                             | 0.0000         | **                  |
| mmu-miR-582-5p   | 0.3361           | 0.0000          | 11.7147                             | 0.0000         | **                  |
| mmu-miR-7083-5p  | 0.3361           | 0.0000          | 11.7147                             | 0.0000         | **                  |
| mmu-miR-1961     | 0.0000           | 0.3316          | 11.6952                             | 0.0000         | **                  |
| mmu-miR-3475-3p  | 0.0000           | 0.3316          | 11.6952                             | 0.0000         | **                  |
| mmu-miR-1949     | 0.3296           | 0.0000          | 11.6866                             | 0.0000         | **                  |
| mmu-miR-181b-1-3 | 0.3290           | 0.0000          | 11.6839                             | 0.0000         | **                  |
| mmu-miR-466f-3p  | 0.3290           | 0.0000          | 11.6839                             | 0.0000         | **                  |
| mmu-miR-496a-3p  | 0.3290           | 0.0000          | 11.6839                             | 0.0000         | **                  |
| mmu-miR-6392-5p  | 0.3290           | 0.0000          | 11.6839                             | 0.0000         | **                  |
| mmu-miR-6944-3p  | 0.3290           | 0.0000          | 11.6839                             | 0.0000         | **                  |
| mmu-miR-6946-3p  | 0.3290           | 0.0000          | 11.6839                             | 0.0000         | **                  |
| mmu-miR-3066-5p  | 0.0000           | 0.3246          | 11.6643                             | 0.0000         | **                  |
| mmu-miR-5615-3p  | 0.0000           | 0.3246          | 11.6643                             | 0.0000         | **                  |
| mmu-miR-3084-3p  | 0.0000           | 0.3238          | 11.6607                             | 0.0000         | **                  |

|                  |            |            |         |        |    |
|------------------|------------|------------|---------|--------|----|
| mmu-miR-33-3p    | 0.0000     | 0.3238     | 11.6607 | 0.0000 | ** |
| mmu-miR-497a-3p  | 0.3056     | 0.0000     | 11.5773 | 0.0000 | ** |
| mmu-miR-203-5p   | 73.7660    | 243.5072   | 1.7229  | 0.0000 | ** |
| mmu-miR-3065-5p  | 5.8604     | 16.9370    | 1.5311  | 0.0000 | ** |
| mmu-miR-133a-3p  | 6030.7385  | 2468.1280  | 1.2889  | 0.0000 | ** |
| mmu-miR-1a-3p    | 42648.5241 | 17684.4320 | 1.2700  | 0.0000 | ** |
| mmu-miR-182-5p   | 664.1259   | 1542.5700  | 1.2158  | 0.0000 | ** |
| mmu-miR-1b-5p    | 12331.6748 | 5483.3207  | 1.1692  | 0.0000 | ** |
| mmu-miR-455-5p   | 497.9211   | 1040.6077  | 1.0634  | 0.0000 | ** |
| mmu-miR-1a-1-5p  | 251.7390   | 93.7025    | 1.4258  | 0.0000 | ** |
| mmu-miR-133a-5p  | 167.9051   | 75.2024    | 1.1588  | 0.0000 | ** |
| mmu-miR-6715-5p  | 0.0000     | 2.5784     | 14.6542 | 0.0000 | ** |
| mmu-miR-3073a-3p | 1.5094     | 6.0734     | 2.0085  | 0.0000 | ** |
| mmu-miR-182-3p   | 0.0000     | 1.5695     | 13.9380 | 0.0000 | ** |
| mmu-miR-1968-5p  | 0.7931     | 3.2581     | 2.0384  | 0.0000 | ** |
| mmu-miR-147-3p   | 2.8497     | 6.5799     | 1.2072  | 0.0000 | ** |
| mmu-miR-135a-5p  | 1.4642     | 0.0000     | 13.8378 | 0.0000 | ** |
| mmu-miR-9769-3p  | 0.0000     | 1.2406     | 13.5988 | 0.0000 | ** |
| mmu-miR-1941-5p  | 2.7880     | 5.9107     | 1.0841  | 0.0002 | ** |
| mmu-miR-7068-3p  | 0.2997     | 1.5706     | 2.3899  | 0.0010 | ** |
| mmu-miR-539-5p   | 1.0512     | 0.0000     | 13.3597 | 0.0010 | ** |
| mmu-miR-363-3p   | 3.1794     | 0.9404     | 1.7575  | 0.0012 | ** |
| mmu-miR-1954     | 0.0000     | 0.7881     | 12.9442 | 0.0022 | ** |
| mmu-miR-467b-5p  | 0.0000     | 0.7865     | 12.9412 | 0.0022 | ** |
| mmu-miR-150-3p   | 3.9748     | 1.6010     | 1.3119  | 0.0031 | ** |
| mmu-miR-491-5p   | 0.8501     | 0.0000     | 13.0535 | 0.0036 | ** |
| mmu-miR-23b-5p   | 0.8474     | 0.0000     | 13.0488 | 0.0036 | ** |
| mmu-miR-874-3p   | 2.5947     | 0.9193     | 1.4969  | 0.0057 | ** |
| mmu-miR-1947-5p  | 1.5564     | 3.1343     | 1.0100  | 0.0061 | ** |
| mmu-miR-137-3p   | 0.6957     | 0.0000     | 12.7642 | 0.0068 | ** |
| mmu-miR-205-5p   | 0.0000     | 0.5828     | 12.5088 | 0.0099 | ** |
| mmu-miR-672-5p   | 0.6944     | 0.0000     | 12.7616 | 0.0128 | *  |
| mmu-miR-196a-5p  | 0.5994     | 0.0000     | 12.5492 | 0.0128 | *  |
| mmu-miR-673-3p   | 2.1282     | 0.7880     | 1.4334  | 0.0191 | *  |
| mmu-miR-6964-3p  | 0.5922     | 0.0000     | 12.5318 | 0.0240 | *  |
| mmu-miR-449a-5p  | 0.5806     | 0.0000     | 12.5032 | 0.0240 | *  |
| mmu-miR-3061-3p  | 0.7873     | 1.6646     | 1.0803  | 0.0357 | *  |
| mmu-miR-652-5p   | 1.0877     | 0.3246     | 1.7446  | 0.0400 | *  |
| mmu-miR-6911-3p  | 1.0589     | 0.3238     | 1.7095  | 0.0400 | *  |
| mmu-miR-2137     | 0.3896     | 1.0370     | 1.4125  | 0.0431 | *  |
| mmu-miR-7213-3p  | 0.5264     | 1.2076     | 1.1980  | 0.0533 |    |
| mmu-miR-669o-5p  | 1.2427     | 0.3895     | 1.6739  | 0.0583 |    |
| mmu-miR-1306-3p  | 1.0176     | 0.3246     | 1.6485  | 0.0623 |    |
| mmu-miR-701-5p   | 0.3290     | 0.7881     | 1.2603  | 0.0940 |    |

|                  |        |        |        |        |
|------------------|--------|--------|--------|--------|
| mmu-miR-6899-3p  | 0.9189 | 0.3246 | 1.5013 | 0.0958 |
| mmu-miR-547-3p   | 0.8791 | 0.3316 | 1.4065 | 0.0958 |
| mmu-miR-6921-3p  | 1.6875 | 0.7867 | 1.1010 | 0.1065 |
| mmu-miR-490-3p   | 0.9672 | 0.3648 | 1.4069 | 0.1292 |
| mmu-miR-31-5p    | 1.0276 | 0.3885 | 1.4032 | 0.1292 |
| mmu-miR-331-5p   | 1.5981 | 0.7457 | 1.0997 | 0.1455 |
| mmu-miR-592-5p   | 1.5647 | 0.7535 | 1.0541 | 0.1455 |
| mmu-miR-146b-3p  | 0.9378 | 0.3570 | 1.3934 | 0.1881 |
| mmu-miR-344-3p   | 0.7251 | 0.3246 | 1.1597 | 0.2172 |
| mmu-miR-20a-3p   | 0.8114 | 0.3570 | 1.1845 | 0.2695 |
| mmu-miR-222-5p   | 0.3596 | 0.7209 | 1.0035 | 0.2772 |
| mmu-miR-129-1-3p | 0.6944 | 0.3238 | 1.1009 | 0.3185 |
| mmu-miR-466h-5p  | 0.6663 | 0.3246 | 1.0377 | 0.3185 |
| mmu-miR-7075-3p  | 0.6586 | 0.3246 | 1.0210 | 0.3185 |

---

\*\*, $P < 0.01$ ; \*, $P < 0.05$
