# Supplementary figures and images for: The role of microRNA-23b-5p in regulating brown adipogenesis and thermogenic program
Source: PubMed Central journal article supplement — Endocr Connect. 2020 Apr 28;9(5):457–70. doi: 10.1530/EC-20-0124 (PMC7274556; doi:10.1530/ec-20-0124), 2020-04-28

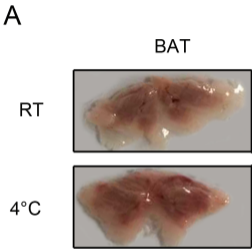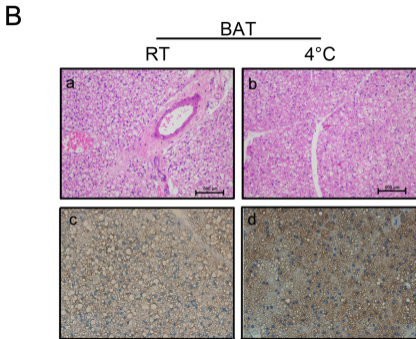

Supplement: supplementary_figure_1.pdf [file supplementary_figure_1.pdf]

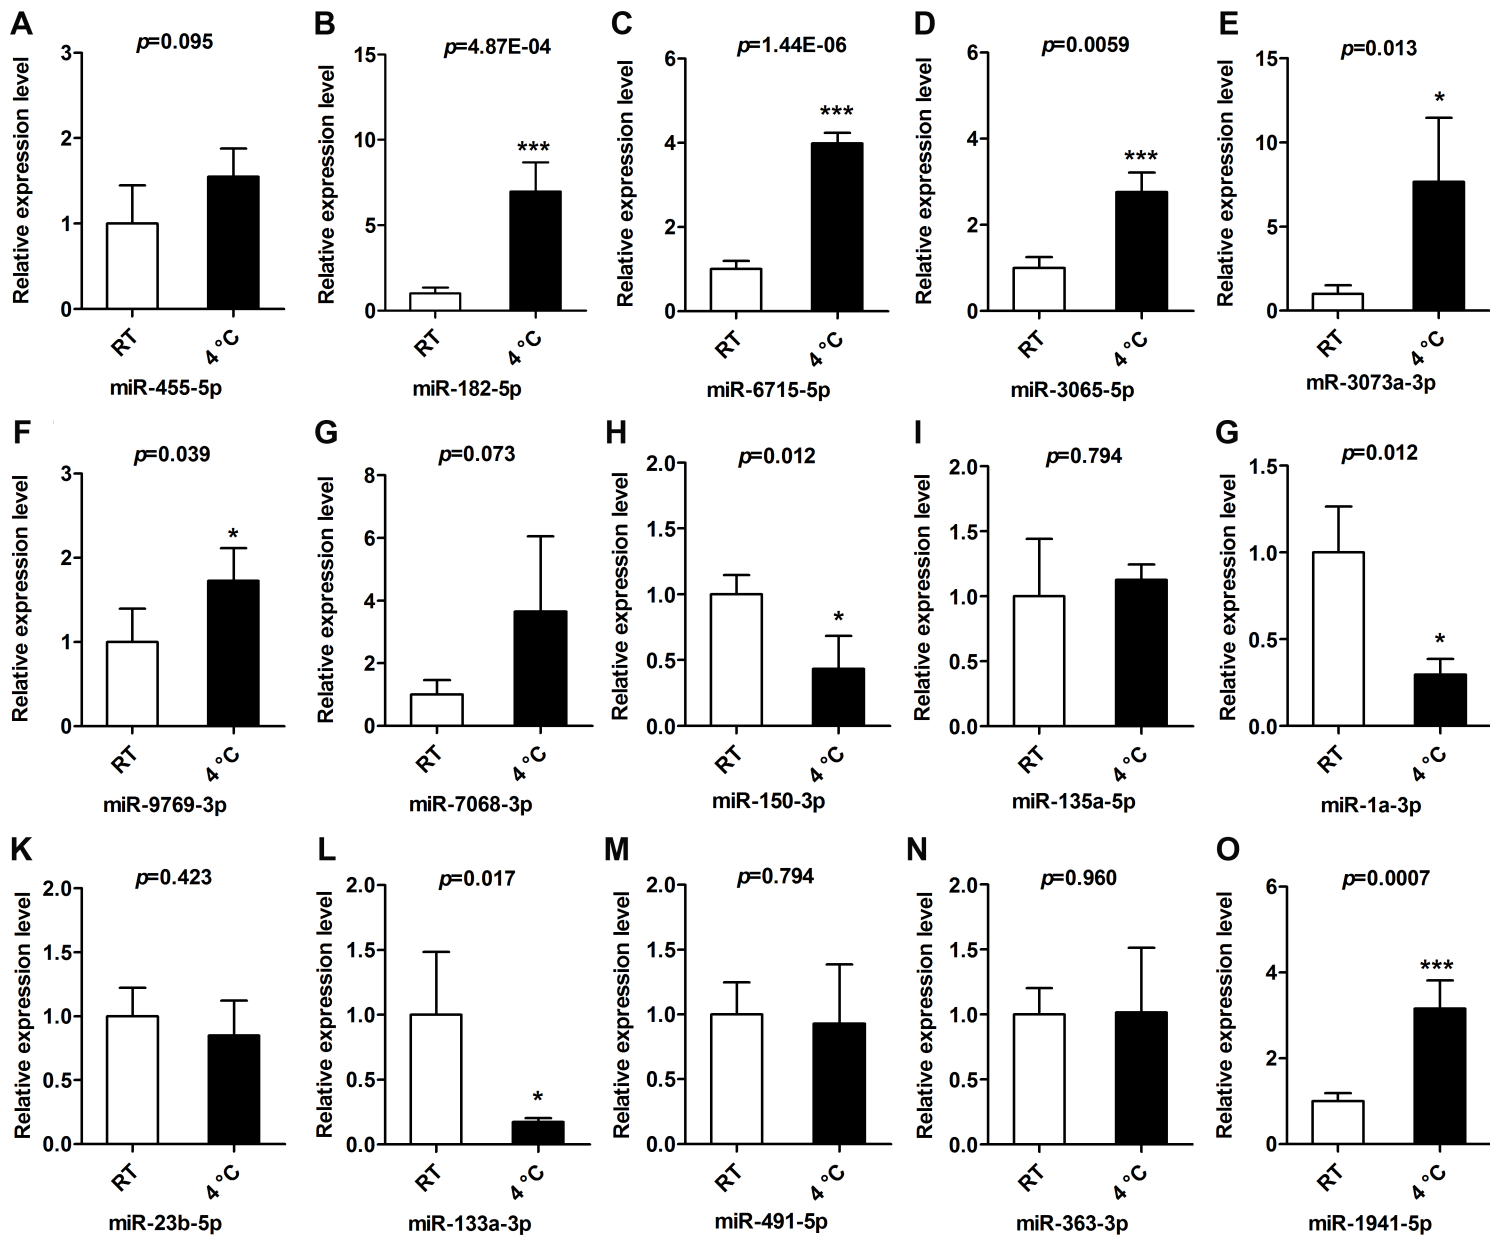

Supplement: supplementary_figure_2.pdf [file supplementary_figure_2.pdf]

# miR-23b-5p

Relative expression level

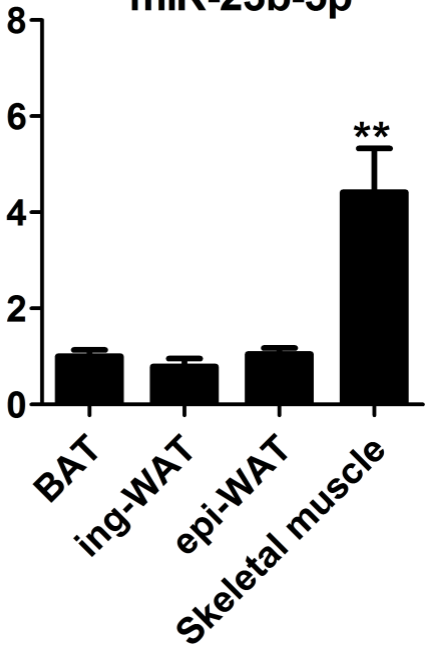

Supplement: supplementary_figure_3.pdf [file supplementary_figure_3.pdf]

**A**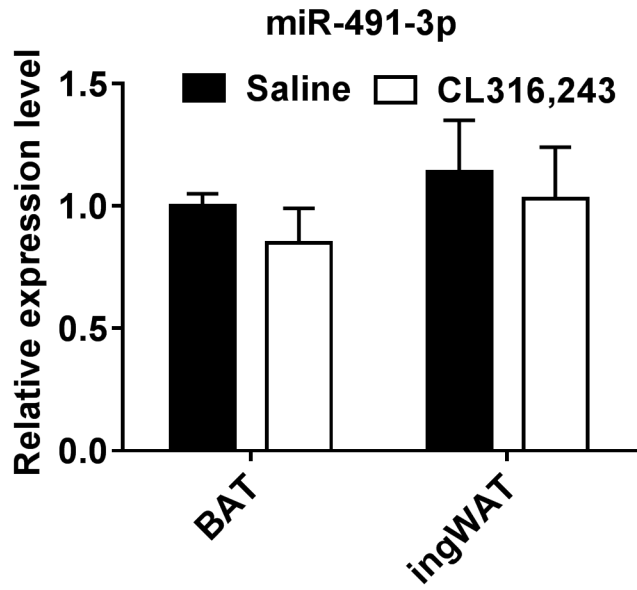**B**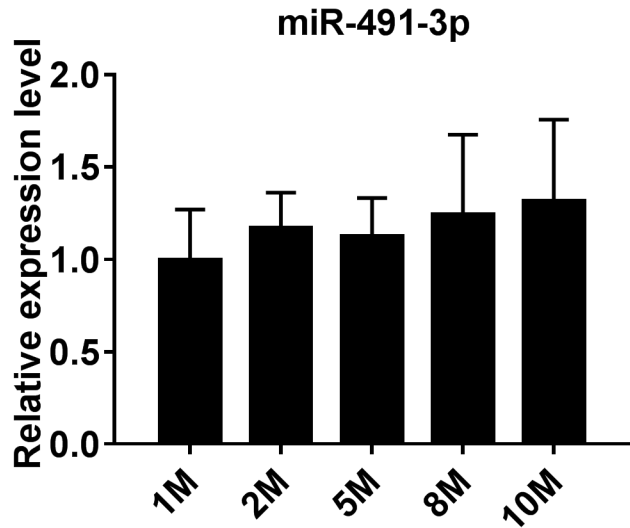

Supplement: supplementary_figure_4.pdf [file supplementary_figure_4.pdf]

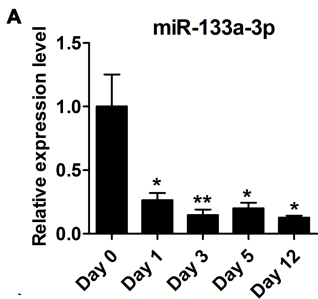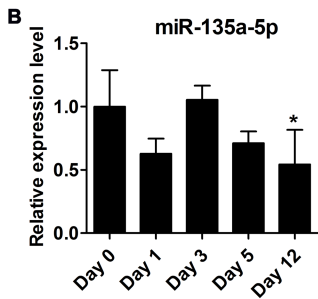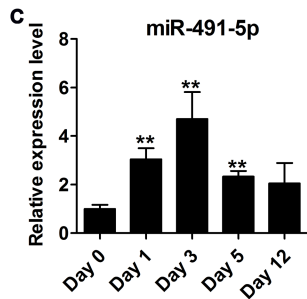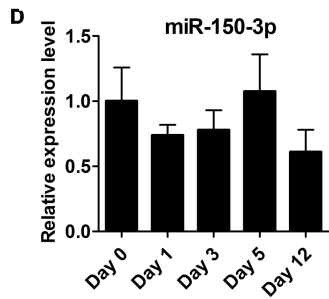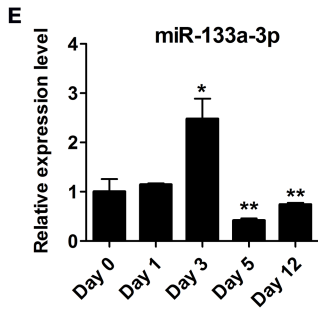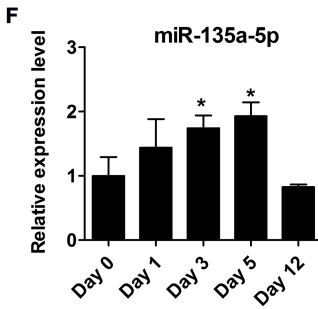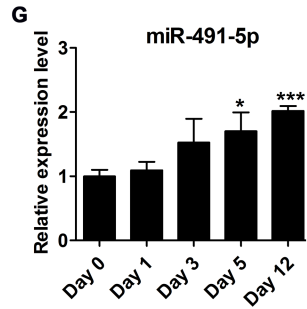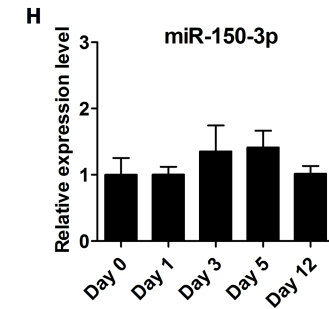

Supplement: supplementary_figure_5.pdf [file supplementary_figure_5.pdf]
